# Supplementary material for: Muscone and (+)-Borneol Cooperatively Strengthen CREB Induction of Claudin 5 in IL-1β-Induced Endothelium Injury
Source: MDPI journal article supplement (doi:10.3390/antiox11081455), 2022-07-26
Supplement: s1 [file s1]

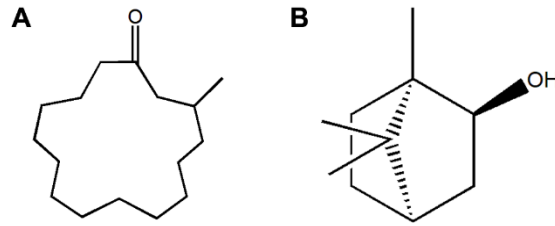

**Figure S1 The structure of muscone and (+)-borneol.** (A) muscone, (B) (+)-borneol.

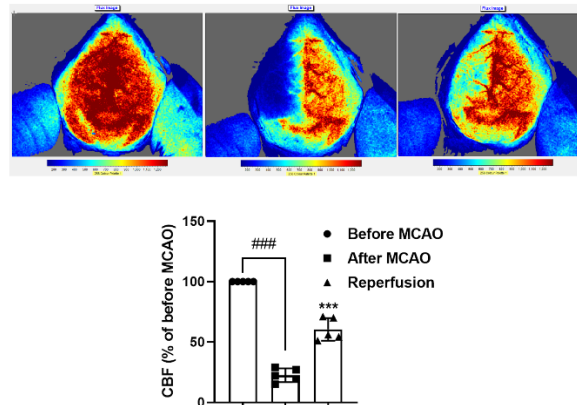

**Figure S2 The local cerebral blood flow of MCAO mice.** cerebral blood flow before MCAO, after MCAO, and reperfusion (CBF, blood flow in the infarct area/blood flow in the contralateral corresponding area \*100%) was reported ( $n = 5$ ). Data are presented as mean  $\pm$  SD ( $n = 5$ ). \*\*\* $p < 0.001$  vs. after MCAO; ### $p < 0.001$  vs. indicated group.  $p$  values are determined by one-way ANOVA followed by Tukey's test.

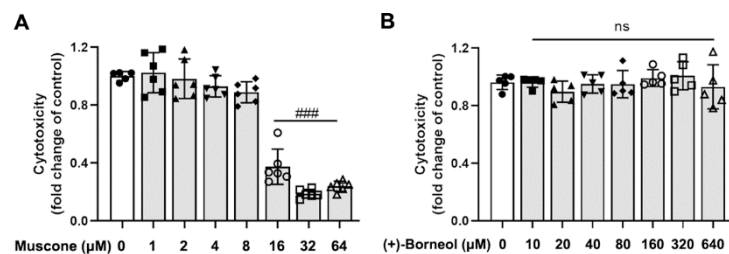

**Figure S3 Cytotoxicity of muscone and (+)-borneol on bEnd.3 cells.** Cell viability of bEnd.3 cells when treated with the indicated concentrations of muscone (A) or (+)-

borneol (**B**) was measured by CCK-8 ( $n = 5$ ). Data are presented as mean  $\pm$  SD ( $n = 5$ ).

###  $p < 0.001$  vs. untreated group; ns: no significant difference.  $p$  values are determined by one-way ANOVA followed by Tukey's test.

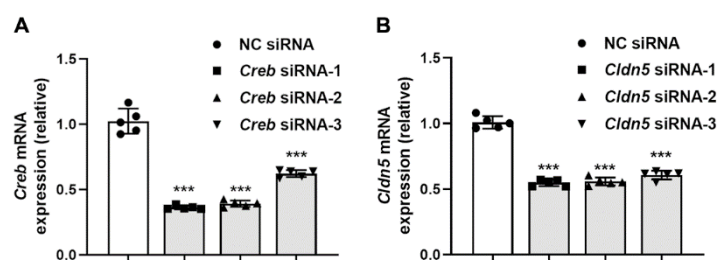

**Figure S4 Small interfering RNA (siRNA) screening.** bEnd.3 cells were transfected with *Creb* siRNA, *Cldn5* siRNA, or NC siRNA using Lipofectamine 3000 transfection reagent for 48 h. (A-B): the gene expressions of *Creb* and *Cldn5* were determined by qRT-PCR ( $n = 5$ ). All data are presented as mean  $\pm$  SD of five independent experiments. \*\*\*  $p < 0.001$  vs. NC siRNA.  $p$  values are determined by one-way ANOVA followed by Tukey's test.

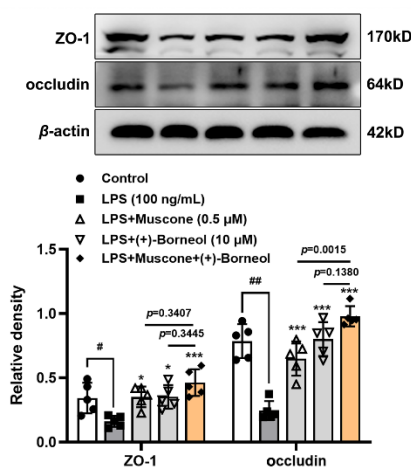

**Figure S5 Muscone and (+)-borneol increased ZO-1 and occludin expression.**

Protein levels of ZO-1 and occludin in LPS-induced bEnd.3 cells treated with muscone and (+)-borneol for 16 h ( $n = 5$ ). Data are presented as mean  $\pm$  SD ( $n = 5$ ). \*  $p < 0.05$ ,

\*\*\* $p < 0.001$  vs. LPS treatment; # $p < 0.05$ , ### $p < 0.01$  vs. indicated treatment.  $p$  values are determined by one-way ANOVA followed by Tukey's test.

**Table S1. Primer sequences for qRT-PCR**

| <b>Primers</b> |         | <b>Sequences</b>                 | <b>Accession number</b> |
|----------------|---------|----------------------------------|-------------------------|
| <i>Il1β</i>    | Forward | 5'- TCGCAGCAGCACATCAACAAGAG -3'  | AK225002                |
|                | Reverse | 5'- AGGTCCACGGGAAAGACACAGG -3'   |                         |
| <i>Cldn5</i>   | Forward | 5'- TGGTGCTGTGTCTGGTAGGATGG -3'  | AK077282                |
|                | Reverse | 5'- GTCACGATGTTGTGGTCCAGGAAG -3' |                         |
| <i>Creb</i>    | Forward | 5'- CCAGGTCCATGGCGTTATCC -3'     | AF448507                |
|                | Reverse | 5'- ACTGCCCCACTGCTAGTTTGG -3'    |                         |
| <i>Actb</i>    | Forward | 5'- CTACCTCATGAAGATCCTGACC -3'   | AK147787                |
|                | Reverse | 5'- CACAGCTTCTCTTTGATGTCAC -3'   |                         |

**Table S2. Primer sequences for ChIP-qPCR**

| <b>Primers</b>                 |         | <b>Sequences</b>            | <b>Accession number</b> |
|--------------------------------|---------|-----------------------------|-------------------------|
| <i>Cldn5</i> promoter (site 1) | Forward | 5'- TCTCCCGCCGTCTTCTAAGA-3' | AC083895                |
|                                | Reverse | 5'- TCCCTGCTCCCTTTGTTTCC-3' |                         |
| <i>Cldn5</i> promoter (site 2) | Forward | 5'- CTGCTGTCCCAGGATTCCAG-3' |                         |
|                                | Reverse | 5'- CAACCACCGCCTACAGTTCT-3' |                         |
